# Supplementary material for: Association between metabolic abnormalities and HBV related hepatocelluar carcinoma in Chinese: A cross-sectional study
Source: Springer Nature journal article supplement (doi:10.1186/1475-2891-10-49), 2011-05-15
Supplement: Additional file 3 [file 1475-2891-10-49-s3.pdf]

Association between metabolic abnormalities and HBV related hepatocelluar carcinoma in Chinese: A cross-sectional study | Nutrition Journal | Full Text


xml version="1.0" encoding="UTF-8"?

Skip to main content

Advertisement

Search


- Explore journals
- Get published
- About BMC
- My account

Search all BMC articles

Search

Nutrition Journal

- Home
- About
- Articles
- Submission Guidelines
- Submit manuscript

Association between metabolic abnormalities and HBV related hepatocelluar carcinoma in Chinese: A cross-sectional study

Download PDF

Download ePub

Download PDF

Download ePub

- Research
- Open access
- Published: 15 May 2011

# Association between metabolic abnormalities and HBV related hepatocelluar carcinoma in Chinese: A cross-sectional study

- Jinyan Zhao1,
- Yunpeng Zhao1,
- Hao Wang2,
- Xing Gu1,
- Jun Ji1 &
- …
- Chunfang Gao1

Show authors

*Nutrition Journal*
**volume 10**, Article number: 49 (2011)
Cite this article

- 6735 Accesses
- 32 Citations
- Metrics details

## Abstract

### Background

Previous studies suggested that the abnormality of metabolism is a newly identified risk factor in HBV-related hepatocellular carcinoma (HCC). The association between metabolic factors and hepatocellular carcinoma (HCC) has not been clarified up to now. This study was conducted to investigate the prevalence of metabolic abnormalities in HCC and to probe the association between metabolic parameters and liver function as well, so as to evaluate the interactions between metabolism and the development of HBV-related HCC.

### Methods

Totally 179 cases of HBV-related HCC, who were surgically treated and pathologically confirmed were enrolled. HBV carriers (n = 100) and healthy controls (n = 150) were recruited from routine physical examination during the same period. Body mass index (BMI) was obtained from medical documentation. All the metabolic-related parameters and liver function tests were determined with routine biochemical or immunological analytic methods. Malondialdehyde (MDA) and total antioxidant capacity(TAOC)were detected by chemical analytic methods. A stratified analysis was conducted according to BMI, glycated albumin (GA), free fatty acids (FFA), and the relationships between the metabolic-related parameters and liver functions were analyzed in HCC and control subjects.

### Results

HCC group showed significantly high levels of mean BMI, serum glucose, low serum lipids levels than controls (P < 0.05). Acquired by stratified analysis, the higher the BMI, the higher level of insulin and homeostasis model assessment for insulin resistance (HOMA-IR) (P < 0.01) were found in HCC patients. Elevated level of MDA and γ-glutamyltransferase (GGT) were revealed in those with high serum FFA level for the first time. Strong associations between metabolic factors and liver function were shown in HCC (P < 0.05). Higher GA level was strongly associated with increased risk of cancer compared to healthy controls (OR = 9.87, 95% confidence interval: 1.86~52.29). Serum triglycerides (TG) and low-density lipoprotein cholesterol (LDL-C) levels were negative contributory factors for HCC (OR = 0.05, 95% confidence interval: 0.01~0.27 and OR = 0.32, 95% confidence interval, 0.11~0.95: respectively).

### Conclusions

Metabolic abnormalities are closely associated with the occurrence and development of HBV-related HCC. Oxidative stress and/or lipid peroxidation might be involved in the pathogenesis and acceleration of liver function impairments in HCC.

Peer Review reports

## Background

Hepatocellular carcinoma (HCC) is the fifth most common cancer and the third cause of cancer-related death worldwide [1]. It has been a major concern in both Western and Asia countries. As known to all, the high prevalence of hepatitis B and C gives rise to the high incidence of HCC. At the same time, so many confounding factors are associated with the occurrence and development of chronic liver diseases [2]. Recently, the relationship between metabolic factors and chronic liver diseases including liver cirrhosis (LC) and hepatocellular carcinoma (HCC) has become a hot topic [3].

Metabolic syndrome (MS) has been recognized as a major public health problem worldwide arousing more attentions. MS is a collection of metabolic abnormalities, including abdominal obesity, blood lipid barrier, diabetes, hypertension. MS is interrelated with insulin resistance, which is also known as insulin resistance syndrome [4]. Nonalcoholic fatty liver disease (NAFLD) as the hepatic manifestation of MS, has been revealed to be associated with insulin resistance [5]. NAFLD is no longer a disease happened in developed Western countries. Fan, et al reported that the prevalence of NAFLD is up to 15% in some urban of China [6]. It was described as a young disease and could progress to end-stage liver diseases, from simple fatty liver, steatohepatitis to liver cirrhosis and HCC [7, 8].

Laboratory tests are useful in reflecting the metabolic abnormalities or liver function impairments. Abnormal levels of aminotransferase (ALT) and bilirubin usually indicate liver functions impairment, but the metabolism of lipid or blood glucose is also among the important functions of the liver. Recently some researches reported that γ-glutamyltransferase (GGT) and ALT could predict the development of MS [9, 10]. Although the associations between metabolic factors and hepatocellular carcinoma (HCC) have been gradually recognized, fewer investigations have been made between the metabolic indicators and HBV-related HCC. Making use of the high prevalence of HBV-related HCC in China [11], we designed a cross-sectional study to clarify the association between metabolic abnormalities and the development of HBV-related HCC.

## Methods

### Subjects and measurements

The study consisted of 179 cases of patients with HBV-related HCC who were diagnosed and confirmed by pathology in the Shanghai Eastern Hepatobiliary Surgery hospital (EHBH) from January to August 2008. Liver cirrhosis was revealed in 66.5% (119/179) of HCC patients. Serum HBsAg was positive in all enrolled HCC. The HBeAg positive cases accounted for 66.5% (119/179). The level of serum HBV DNA higher than 103 copy/ml accounted for 63.7% (114/179). The HCC stage was classified according to the TNM criteria (2002) [12]: T1, a solitary tumor without vascular invasion; T2, a solitary tumor with vascular invasion or multiple tumors of 5 cm or less; T3, multiple tumors greater than 5 cm invading the major branches of portal or hepatic veins; and T4, tumors with direct invasion of adjacent organs other than the gallbladder or with perforation of visceral peritoneum. N0/1, with/without regional lymph node metastasis. M0/1, with/without distant metastasis. Stage I, T1N0M0; Stage II, T2N0M0; Stage IIIA, T3N0M0; Stage IIIB, T4N0M0; Stage IIIC, Tany N1M0; Stage IV, Tany Nany M1. All the patients' information was obtained by hospital medical records. One hundred cases of HBV carriers were collected from the Shanghai Changzheng hospital. The HBV carriers was defined as positive serum hepatitis B surface antigen (HBsAg) for at least 6 months but who have repeatedly normal (or minimally raised) liver enzymes and negative tests for HBeAg before enrolling [13]. Patients with hepatitis A virus, HCV, hepatitis D virus, hepatitis E virus, human immunodeficiency virus, Epstein-Barr virus, and cytomegalovirus infection, alcohol consumption > 30 g/day, metastatic liver cancer, autoimmune liver disease, drug-related liver disease, alcoholic hepatitis, obstructive jaundice, other causes of chronic liver disease, renal inadequacy or blood diseases were excluded from the patients cohort. The 150 cases of healthy control were recruited from routine physical examination in EHBH.

The study protocol was approved by the Chinese Ethics Committee of Human Resources, Eastern Hepatobiliary Hospital. Informed consents were obtained both from the patients and the healthy donors.

The information of weight, height, blood pressures, tumor size and whether there were any violations of metastasis, medical history, life style characteristics and other related information were collected from medical documentation. Body mass index (BMI) was calculated by dividing body weight in kilograms by the square of height in meters. Waist circumference was not measured in this study. According to the standard of obesity in Chinese population [14], obesity was divided into two groups, normal BMI level (BMI 18.5 to 23.9 kg/m2) and abnormal BMI (BMI≥ 24 kg/m2). Blood specimens were drawn after 12 h of fasting and were subsequently measured at the Department of Laboratory Medicine in EHBH. All the blood samples were collected before surgery. The measured liver function indicators were: total bilirubin (TBIL), direct bilirubin (DBIL), total bile acid (TBA), total protein (TP), albumin (ALB), prealbumin (PALB), ALT, aspartate aminotransferase (AST), GGT, alkaline phosphatase (ALP). Indicators of lipid metabolism consisted of FFA, TG, total cholesterol (TC), LDL-cholesterol (LDL-C), apolipoprotein B (ApoB). Relevant indicators of glucose metabolism included glycated albumin (GA), fasting glucose, insulin and C-peptide. All the measurements were performed on HITACHI 7600 automatic biochemical analyzer with matched reagents. High-density lipoprotein cholesterol (HDL-cholesterol, HDL-C) was calculated by the Friedewald equation [15]. Quantitative insulin sensitivity check index (QUICKI) [16] and homeostasis model assessment for insulin resistance (HOMA-IR) were calculated to evaluated insulin resistance [17]. Oxidative stress marker MDA was measured using the thiobarbituric acid-reactive substances (TBARS) assay, TAOC was measured with Fe3+ reduction method. Alpha-fetoprotein (AFP), carcino-embryonic antigen (CEA) and CA19-9 were determined on Roche E170 with chemiluminescence; Hepatitis B virus related surface antigen and antibody were detected by ARCHITECT I 2000SR using chemiluminescent microparticle immunoassay (CMIA).

### Statistical analysis

The statistical analyses were conducted using SPSS version 11.5 statistical software Data were presented as median and range for nonparametric variables and mean ± SD for parametric variables. One-way analysis of variance for non-parametric data was performed by a post hoc analysis using Kruskal-Wallis H test. Parametric variables were compared by post hoc analysis using Tukey test. BMI, GA, FFA were classified into categories so as to make stratified analysis. Categorical variables were compared using a Mann-Whitney U test. For analysis of the correlation between two indicators (liver functions and metabolic parameters), spearman correlation analysis was performed. For multivariate analysis, multivariate logistic regression analysis was applied. The OR was used to estimate the relative risk of HCC. All p-values were two-tailed and p-values less than 0.05 were considered significant.

## Results

The general demographic information of all the subjects was listed in Table 1. There were significant differences in TBIL, TP, ALB, ALT, AFP among HCC patients, HBV carrier and healthy controls (p < 0.05). Stages of HCC were 49 (27.37%) in I, 69 (38.55%) in II, 49 (27.37%) in III and 6 (3.35%) in IV by TNM classification. The metabolic parameters of the three groups were displayed in Figure 1. HCC group showed significantly lower levels of TC, TG and higher levels of GA than both diseased and healthy controls (p < 0.01), while significantly higher levels of MDA and lower levels of TAOC were revealed in HCC (p < 0.01). Though there was no difference for LDL-C between HCC ptients and HBV carriers, LDL-C was higher in HCC patients than that in healthy controls (p < 0.01).

**Table 1 Characteristics of all enrolled subjects**

Full size table

**Figure 1**

**Metabolic parameters in healthy controls, HBV carriers and HCC**. Totally 179 cases of patients with HBV-related HCC, 100 cases of HBV carriers and 150 cases of healthy controls were recruited. The liver function indicators and GA were measured on HITACHI 7600 automatic biochemical analyzer with matched reagents. Oxidative stress marker malondialdehyde (MDA) was measured using the thiobarbituric acid-reactive substances (TBARS) assay, total antioxidant capacity (TAOC) was measured with Fe3+ reduction method. HCC group showed significantly lower levels of TC, TG and higher levels of GA than both diseased and healthy controls (p < 0.01), while significantly higher levels of MDA and lower levels of TAOC were revealed in HCC (p < 0.01). LDL-C was higher in HCC than that in healthy controls (p < 0.01). Data were expressed as percentages ± standard error. \* *p* value < 0.01 vs. control. Parametric variables were compared by post hoc analysis using Tukey test.

Full size image

The impacts of BMI, GA, FFA on liver functions as well as on the other metabolic parameters were revealed in Table 2. With the increasing of BMI, the higher level of GLU, HOMA-IR, Insulin, QUICKI, FFA, TG and LDL-C. (p < 0.05) were found in HCC patients. There was no significant difference of liver function in different BMI subgroups. GLU and ALP were significant higher in higher GA group than that in normal GA after stratified by GA at the borderline value (p < 0.05). Similarly, FFA was used to classify the subjects into abnormal (higher) and normal group, MDA and GGT were significantly higher in abnormal group than that in normal one (p < 0.05). We failed to find any differences between the TNM stages and the metabolic parameters or liver functions (data not shown).

**Table 2 Changes of metabolic parameters and liver functions in HCC subjects with different BMI, GA, FFA**

Full size table

The association study revealed that the parameters reflecting liver function were correlated with metabolic indicators (Table 3). Especially the liver enzymes, AST and ALP, were positively correlated with QUICKI, GA, INS, (p < 0.05) and negatively correlated with IR. GGT was correlated with FFA and HDL-C (p < 0.05). The association study among metabolic parameters in HCC patients showed that BMI was positively associated with IR, INS, C-peptide and negatively related with QUICKI and GA. MDA was positively associated with FFA and negatively related with HDL. TAOC was correlated with TC, TG and HDL-C (p < 0.05) (Table 4).

**Table 3 Association study among liver functions, tumor markers and metabolic parameters in HCC**

Full size table

**Table 4 Association study between metabolic parameters in HCC**

Full size table

GA, TG, LDL and HDL were shown as risk factors for HCC after stepwise multiple regression analysis (Table 5). High GA level was strongly associated with increased risk of cancer compared to healthy control (OR, 9.87; 95% CI, 1.86~52.29) and HBV carriers (OR, 16.67; 95% CI, 1.89~147.3). Interestingly serum TG levels were strongly associated with reduced risk of cancer development (OR = 0.05, 95% CI: 0.01~0.27) and HBV carriers (OR = 0.12, 95% CI: 0.04~0.37) respectively. The risk of cancer was also markedly attenuated with higher LDL-C levels (OR = 0.32, 95% CI: 0.11~0.95). Low HDL-C was strongly associated with increased risk of HBV carriers (OR = 11.81, 95% CI: 2.37~58.91) and HCC development (OR = 11.99, 95% CI: 1.8~77.56) respectively.

**Table 5 Multiple logistic regression analysis to explore risk factors contributing to HCC**

Full size table

The above results were also achieved after stratified analysis by age (see Additional file 1 Table S1-S3) and gender (see Additional file 2 Table S4-S5). The tumor size was negatively associated with TG (p < 0.05) and positively related to GGT (p < 0.01) (see Additional file 3 Figure S1).

## Discussion

Metabolic syndrome is composed of a complex constellation of factors, that namely glucose intolerance and insulin resistance, central obesity, dyslipidemia, hypertension [4, 18, 19]. Over the past decade several researches have produced preliminary clues on the relationship between metabolic syndrome and hepatocellular carcinoma [20, 21]. However, few studies have investigated the association between metabolic factors and HBV-related HCC. As with the development of economy and changing of living behavior, metabolic-related chronic diseases have become more common in China. The present study extended the research on metabolic abnormalities in HBV related HCC in Chinese populations.

Insulin resistance and obesity, the majority components of MS are often revealed to be linked with cancer and now widely recognized as significant risk factors for HCC [22–24]. Our data displayed that with the increasing of BMI, the higher level of GLU, HOMA-IR, Insulin, QUICKI, FFA, TG and LDL-C. (p < 0.05) were found in HCC. Similar study demonstrated that HOMA-IR, a marker of insulin resistance, is elevated with increasing BMI[25]. The link between obesity/diabetes and HCC may be explained by oxidative stress and/or lipid peroxidation that increase the possibility of hepatic injury, fibrosis, and even cirrhosis result from hepatic inflammation [26, 27]. Increased plasma insulin concentration combined with impaired whole-body glucose clearance in the present study was most likely a consequence of decreased insulin sensitivity, a typical phenomenon in patients with malignant diseases [28, 29].

In investigation the existence of oxidative stress and/or lipid peroxidation in HCC, we measured MDA and TAOC in all subjects. MDA is the lipid peroxidation end product and an important player in oxidative stress. Now MDA is widely used as one of the most reliable indices of oxidative stress to evaluate the oxidative damage in diseased status[30]. TAOC is an index of the antioxidative defense system. We found for the first time that elevated levels of oxidative stress(MDA) and decreased antioxidative capacity (TAOC) were revealed in HCC patients. The results were consistent with the finding that HBV infection could increase toxic oxidation products, which lead to oxidative stress and DNA damage [31, 32]. HBV X protein has drawn considerable attention to the generation of HCC via mitochondria-derived reactive oxygen species (ROS). ROS could activate kupffer cells modulating hepatocyte injury and generating ROS, accompanied by lipid peroxidation, further impairment of mitochondrial function, which contributed much to carcinogenesis [32]. In addition, ROS are most potent and can modify DNA methylation [33, 34]. But what predominates the extent of liver injury in HBV-related HCC and how abnormal metabolism accelerates the pathogenesis of HCC remain to be elucidated.

The liver is a critical organ in maintaining glucose and lipid homeostasis. The decreased glucose metabolism, utilization and downregulation of triglyceride synthesis in HCC patients were revealed in this study. ALT as an indicator of liver injury was obviously elevated in HCC in our observation (table 1). The elevation of ALT levels might be the reflection of excess accumulation of fat in the liver because of various metabolic abnormalities and indicated ongoing inflammation which impairs insulin signaling in the liver [35–37]. Our further logistic regression analysis revealed that lower TG and cholesterol levels as well as higher GA were contributing factors to HCC (Table 5). Meanwhile we found that the inverse correlation between serum TG and tumor size, the positive correlation between tumor size and GGT (supplementary Figure 1). These interesting observations indicate the intimate relation between lipid or glucose metabolisms and HBV-related malignancies, The contradicatory associations, ie. the inverse and positive correlations between lipid metabolisms and HCC, as revealed by us and others further demonstrated the complicated process of dyslipidemia involved in the pathogenesis HCC[26, 38, 39]. Though the mechanism how HBV-related diseases were closely related to lipid metabolisms is not clarified up to now, there are several studies supporting our findings: (1) HBV infection disturbs liver lipid metabolism, which was reported by Jan et al and revealed that low serum TG level was also associated with chronic HBV infection [40]. Another independent in vitro study had ever demonstrated that HBX protein could directly inhibit secretion of ApoB, an essential component of LDL-C and very-low-density lipoprotein (VLDL-C), via promoting high expression of N-acetylglucosaminyltransferase III, in cell culture [41, 42]. (2) Lipids and lipoprotein metabolisms could be regulated by cytokines, while tumor cells are known to produce large amounts of pro-inflammatory cytokines. For instance, interleukin-6 (IL-6), tumor necrosis factor (TNF-α), IL-1 may inhibit TG synthesis [43]. (3)The change of general nutritional status in exhaustive malignant diseases is another important factor leading to dyslipidemia. Low levels of TG and cholesterol were also revealed in other malignancies including colorectal cancer, lung cancer and so on [44–47]. Although our findings of inverse relationship between TG level and HCC were also consistent with previous study[26, 48], the possibility that low TG was a consequence of malignant liver diseases (HCC) can not be excluded. Hence further prospective study should be designed to elucidate the causative or consequent effect or even both causative and consequent effects of dyslipidemia in HBV-related HCC in future study.

Another important metabolic indicator which could be linked with obesity is FFA. FFA is normally released from an expanded adipose tissue and produced an increased secretion of VLDL. MDA, the lipid peroxidation end product via fatty acid β-oxidation, was found to be associated with FFA in this study. Our result further confirmed that obesity might be related with liver injury and eventual accelerating the development of HCC [49, 50].

There are some limitations of this study. HBV carrier was used as disease control instead of CLD (fibrosis and cirrhosis). Metabolic abnormality might develop in CLD and abnormal metabolism could accelerate the progress of CLD at the same time. Further validation in CLD groups and in large sample size were required to illustrate the value of metabolic assessment in the prediction and prognosis in HCC. Another limitation is that the research is a cross-sectional study drawn from a clinical series of patients and not from the community. But the cases were carefully matched or stratified by age, gender, BMI, time of hospital admission and etiology to minimize the interferences. A better understanding of the relationship between these metabolic parameters should ultimately lead to improve prediction and treatment options for patients with HBV related HCC. To counteract the adverse effects of metabolic abnormalities, those infected with HBV should first attempt to achieve the metabolic control through changes in diet and life style.

## Conclusions

This study concluded that metabolic abnormalities are closely associated with the occurrence and development of HBV-related HCC. Oxidative stress and/or lipid peroxidation identified in HCC might be involved in the pathogenesis. The predictive value of metabolism parameter and the pathogenesis of abnormal metabolism in HCC require further validation in future study.

## Abbreviations

(BMI):
:   Body mass index

(MDA):
:   malondialdehyde

(TAOC):
:   total antioxidant capacity

(GA):
:   glycated albumin

(Ins):
:   Insulin

(QUICKI):
:   Quantitative insulin sensitivity check index

(HOMA-IR):
:   homeostasis model assessment for insulin resistance

(FFA):
:   free fatty acids

(ROS):
:   reactive oxygen species

(TBIL):
:   total bilirubin

(DBIL):
:   direct bilirubin

(TBA):
:   total bile acid

(TP):
:   (ALB): total protein albumin

(ALT):
:   alanine aminotransferase

(AST):
:   aspartate aminotransferase

(GGT):
:   γ-glutamyltransferase

(ALP):
:   alkaline phosphatase

(TG):
:   triglycerides

(TC):
:   total cholesterol

(LDL-cholesterol):
:   low-density lipoprotein cholesterol

(HDL-cholesterol):
:   High-density lipoprotein cholesterol

(ApoB):
:   apolipoprotein B

(AFP):
:   alpha-fetoprotein.

## References

1. Parkin DM: Global cancer statistics in the year 2000. Lancet Oncol. 2001, 2 (9): 533-543. 10.1016/S1470-2045(01)00486-7.

   Article 
   CAS 
   PubMed 
   Google Scholar
2. Gomaa AI, Khan SA, Toledano MB, Waked I, Taylor-Robinson SD: Hepatocellular carcinoma: epidemiology, risk factors and pathogenesis. World J Gastroenterol. 2008, 14 (27): 4300-4308. 10.3748/wjg.14.4300.

   Article 
   PubMed 
   PubMed Central 
   Google Scholar
3. Wong GL, Wong VW, Choi PC, Chan AW, Chim AM, Yiu KK, Chan HY, Chan FK, Sung JJ, Chan HL: Metabolic syndrome increases the risk of liver cirrhosis in chronic hepatitis B. Gut. 2009, 58 (1): 111-117. 10.1136/gut.2008.157735.

   Article 
   PubMed 
   Google Scholar
4. Eckel RH, Grundy SM, Zimmet PZ: The metabolic syndrome. Lancet. 2005, 365 (9468): 1415-1428. 10.1016/S0140-6736(05)66378-7.

   Article 
   CAS 
   PubMed 
   Google Scholar
5. Marchesini G, Brizi M, Bianchi G, Tomassetti S, Bugianesi E, Lenzi M, McCullough AJ, Natale S, Forlani G, Melchionda N: Nonalcoholic fatty liver disease: a feature of the metabolic syndrome. Diabetes. 2001, 50 (8): 1844-1850. 10.2337/diabetes.50.8.1844.

   Article 
   CAS 
   PubMed 
   Google Scholar
6. Fan JG, Farrell GC: Epidemiology of non-alcoholic fatty liver disease in China. J Hepatol. 2009, 50 (1): 204-210. 10.1016/j.jhep.2008.10.010.

   Article 
   PubMed 
   Google Scholar
7. Bellentani S, Bedogni G, Miglioli L, Tiribelli C: The epide miology of fatty liver. Eur J Gastroenterol Hepatol. 2004, 16 (11): 1087-1093. 10.1097/00042737-200411000-00002.

   Article 
   PubMed 
   Google Scholar
8. Marrero JA, Fontana RJ, Su GL, Conjeevaram HS, Emick DM, Lok AS: NAFLD may be a common underlying liver disease in patients with hepatocellular carcinoma in the United States. Hepatology. 2002, 36 (6): 1349-1354.

   Article 
   PubMed 
   Google Scholar
9. Jo SK, Lee WY, Rhee EJ, Won JC, Jung CH, Park CY, Oh KW, Park SW, Kim SW: Serum gamma-glutamyl transferase activity predicts future development of metabolic syndrome defined by 2 different criteria. Clin Chim Acta. 2009, 403 (1-2): 234-240. 10.1016/j.cca.2009.03.035.

   Article 
   CAS 
   PubMed 
   Google Scholar
10. Kasapoglu B, Turkay C, Bayram Y, Koca C: Role of GGT in diagnosis of metabolic syndrome: a clinic-based cross-sectional survey. Indian J Med Res. 2010, 132: 56-61.

    CAS 
    PubMed 
    Google Scholar
11. Yuen MF, Hou JL, Chutaputti A: Hepatocellular carcinoma in the Asia pacific region. J Gastroenterol Hepatol. 2009, 24 (3): 346-353. 10.1111/j.1440-1746.2009.05784.x.

    Article 
    PubMed 
    Google Scholar
12. Sobin LH, Wittekind CL, eds: TNM classification of malignant tumors. 2002, New York: Wiley, 6
13. Martinot-Peignoux M, Boyer N, Colombat M, Akremi R, Pham BN, Ollivier S, Castelnau C, Valla D, Degott C, Marcellin P: Serum hepatitis B virus DNA levels and liver histology in inactive HBsAg carriers. J Hepatol. 2002, 36 (4): 543-546. 10.1016/S0168-8278(02)00004-1.

    Article 
    CAS 
    PubMed 
    Google Scholar
14. Wu Y: Overweight and obesity in China. BMJ. 2006, 333 (7564): 362-363. 10.1136/bmj.333.7564.362.

    Article 
    PubMed 
    PubMed Central 
    Google Scholar
15. Friedewald WT, Levy RI, Fredrickson DS: Estimation of the concentration of low-density lipoprotein cholesterol in plasma, without use of the preparative ultracentrifuge. Clin Chem. 1972, 18 (6): 499-502.

    CAS 
    PubMed 
    Google Scholar
16. Katz A, Nambi SS, Mather K, Baron AD, Follmann DA, Sullivan G, Quon MJ: Quantitative insulin sensitivity check index: a simple, accurate method for assessing insulin sensitivity in humans. J Clin Endocrinol Metab. 2000, 85 (7): 2402-2410. 10.1210/jc.85.7.2402.

    Article 
    CAS 
    PubMed 
    Google Scholar
17. Matthews DR, Hosker JP, Rudenski AS, Naylor BA, Treacher DF, Turner RC: Homeostasis model assessment: insulin resistance and beta-cell function from fasting plasma glucose and insulin concentrations in man. Diabetologia. 1985, 28 (7): 412-419. 10.1007/BF00280883.

    Article 
    CAS 
    PubMed 
    Google Scholar
18. Grundy SM, Brewer HB, Cleeman JI, Smith SC, Lenfant C: Definition of metabolic syndrome: Report of the National Heart, Lung, and Blood Institute/American Heart Association conference on scientific issues related to definition. Circulation. 2004, 109 (3): 433-438. 10.1161/01.CIR.0000111245.75752.C6.

    Article 
    PubMed 
    Google Scholar
19. Opie LH: Metabolic syndrome. Circulation. 2007, 115 (3): e32-35. 10.1161/CIRCULATIONAHA.106.671057.

    Article 
    PubMed 
    Google Scholar
20. Inoue M, Kurahashi N, Iwasaki M, Tanaka Y, Mizokami M, Noda M, Tsugane S: Metabolic factors and subsequent risk of hepatocellular carcinoma by hepatitis virus infection status: a large-scale population-based cohort study of Japanese men and women (JPHC Study Cohort II). Cancer Causes Control. 2009, 20 (5): 741-750. 10.1007/s10552-008-9287-6.

    Article 
    PubMed 
    Google Scholar
21. Paradis V, Zalinski S, Chelbi E, Guedj N, Degos F, Vilgrain V, Bedossa P, Belghiti J: Hepatocellular carcinomas in patients with metabolic syndrome often develop without significant liver fibrosis: a pathological analysis. Hepatology. 2009, 49 (3): 851-859. 10.1002/hep.22734.

    Article 
    PubMed 
    Google Scholar
22. Caldwell SH, Crespo DM, Kang HS, Al-Osaimi AM: Obesity and hepatocellular carcinoma. Gastroenterology. 2004, 127 (5 Suppl 1): S97-103.

    Article 
    CAS 
    PubMed 
    Google Scholar
23. Davila JA, Morgan RO, Shaib Y, McGlynn KA, El-Serag HB: Diabetes increases the risk of hepatocellular carcinoma in the United States: a population based case control study. Gut. 2005, 54 (4): 533-539. 10.1136/gut.2004.052167.

    Article 
    CAS 
    PubMed 
    PubMed Central 
    Google Scholar
24. El-Serag HB, Tran T, Everhart JE: Diabetes increases the risk of chronic liver disease and hepatocellular carcinoma. Gastroenterology. 2004, 126 (2): 460-468. 10.1053/j.gastro.2003.10.065.

    Article 
    PubMed 
    Google Scholar
25. Esteghamati A, Khalilzadeh O, Anvari M, Ahadi MS, Abbasi M, Rashidi A: Metabolic syndrome and insulin resistance significantly correlate with body mass index. Arch Med Res. 2008, 39 (8): 803-808. 10.1016/j.arcmed.2008.08.004.

    Article 
    CAS 
    PubMed 
    Google Scholar
26. Chen CL, Yang HI, Yang WS, Liu CJ, Chen PJ, You SL, Wang LY, Sun CA, Lu SN, Chen DS, Chen CJ: Metabolic factors and risk of hepatocellular carcinoma by chronic hepatitis B/C infection: a follow-up study in Taiwan. Gastroenterology. 2008, 135 (1): 111-121. 10.1053/j.gastro.2008.03.073.

    Article 
    CAS 
    PubMed 
    Google Scholar
27. Yu MC, Yuan JM: Environmental factors and risk for hepatocellular carcinoma. Gastroenterology. 2004, 127 (5 Suppl 1): S72-78.

    Article 
    CAS 
    PubMed 
    Google Scholar
28. Porepa L, Ray JG, Sanchez-Romeu P, Booth GL: Newly diagnosed diabetes mellitus as a risk factor for serious liver disease. CMAJ. 2010, 182 (11): E526-531.

    Article 
    PubMed 
    PubMed Central 
    Google Scholar
29. Hung CH, Wang JH, Hu TH, Chen CH, Chang KC, Yen YH, Kuo YH, Tsai MC, Lu SN, Lee CM: Insulin resistance is associated with hepatocellular carcinoma in chronic hepatitis C infection. World J Gastroenterol. 2010, 16 (18): 2265-2271. 10.3748/wjg.v16.i18.2265.

    Article 
    CAS 
    PubMed 
    PubMed Central 
    Google Scholar
30. Dalle-Donne I, Rossi R, Colombo R, Giustarini D, Milzani A: Biomarkers of oxidative damage in human disease. Clin Chem. 2006, 52 (4): 601-623. 10.1373/clinchem.2005.061408.

    Article 
    CAS 
    PubMed 
    Google Scholar
31. Bolukbas C, Bolukbas FF, Horoz M, Aslan M, Celik H, Erel O: Increased oxidative stress associated with the severity of the liver disease in various forms of hepatitis B virus infection. BMC Infect Dis. 2005, 5: 95-10.1186/1471-2334-5-95.

    Article 
    PubMed 
    PubMed Central 
    Google Scholar
32. Hagen TM, Huang S, Curnutte J, Fowler P, Martinez V, Wehr CM, Ames BN, Chisari FV: Extensive oxidative DNA damage in hepatocytes of transgenic mice with chronic active hepatitis destined to develop hepatocellular carcinoma. Proc Natl Acad Sci USA. 1994, 91 (26): 12808-12812. 10.1073/pnas.91.26.12808.

    Article 
    CAS 
    PubMed 
    PubMed Central 
    Google Scholar
33. Roberts RA, Ganey PE, Ju C, Kamendulis LM, Rusyn I, Klaunig JE: Role of the Kupffer cell in mediating hepatic toxicity and carcinogenesis. Toxicol Sci. 2007, 96 (1): 2-15.

    Article 
    CAS 
    PubMed 
    Google Scholar
34. Sasaki Y: Does oxidative stress participate in the development of hepatocellular carcinoma?. J Gastroenterol. 2006, 41 (12): 1135-1148.

    Article 
    CAS 
    PubMed 
    Google Scholar
35. Chen ZW, Chen LY, Dai HL, Chen JH, Fang LZ: Relationship between alanine aminotransferase levels and metabolic syndrome in nonalcoholic fatty liver disease. J Zhejiang Univ Sci B. 2008, 9 (8): 616-622. 10.1631/jzus.B0720016.

    Article 
    CAS 
    PubMed 
    PubMed Central 
    Google Scholar
36. Petersen KF, Dufour S, Befroy D, Lehrke M, Hendler RE, Shulman GI: Reversal of nonalcoholic hepatic steatosis, hepatic insulin resistance, and hyperglycemia by moderate weight reduction in patients with type 2 diabetes. Diabetes. 2005, 54 (3): 603-608. 10.2337/diabetes.54.3.603.

    Article 
    CAS 
    PubMed 
    PubMed Central 
    Google Scholar
37. Suh SY, Choi SE, Ahn HY, Yang HM, Kim YI, Sung NJ: The association between normal alanine aminotransferase levels and the metabolic syndrome: 2005 Korean National Health and Nutrition Examination Survey. Metabolism. 2009, 58 (12): 1731-1736. 10.1016/j.metabol.2009.05.028.

    Article 
    CAS 
    PubMed 
    Google Scholar
38. Sowa J-p, Penndorf V, Herzer K, Kaiser G, Ertle J, Deche A, Gerken G, Syn W-k, Canbay A: Non-alcoholic fatty liver disease progresses to hepatocellular carcinoma in the absence of apparent cirrhosis. International Journal of Cancer. 2011, 128: 2436-2443. 10.1002/ijc.25797.

    Article 
    PubMed 
    Google Scholar
39. Starley BQ, Calcagno CJ, Harrison SA: Nonalcoholic Fatty Liver Disease and Hepatocellular Carcinoma: A Weighty Connection. Hepatology. 2011, 5: 1820-1832.

    Google Scholar
40. Jan CF, Chen CJ, Chiu YH, Chen LS, Wu HM, Huang CC, Yen MF, Chen TH: A population-based study investigating the association between metabolic syndrome and hepatitis B/C infection. Int J Obes. 2006, 1-6.

    Google Scholar
41. Kang SK, Chung TW, Lee JY, Lee YC, Morton RE, Kim CH: The hepatitis B virus X protein inhibits secretion of apolipoprotein B by enhancing the expression of N-acetylglucosaminyltransferase III. J Biol Chem. 2004, 279 (27): 28106-28112. 10.1074/jbc.M403176200.

    Article 
    CAS 
    PubMed 
    Google Scholar
42. Lee J, Song EY, Chung TW, Kang SK, Kim KS, Chung TH, Yeom YI, Kim CH: Hyperexpression of N-acetylglucosaminyltransferase-III in liver tissues of transgenic mice causes fatty body and obesity through severe accumulation of Apo A-I and Apo B. Arch Biochem Biophys. 2004, 426 (1): 18-31. 10.1016/j.abb.2003.12.039.

    Article 
    CAS 
    PubMed 
    Google Scholar
43. Michiel DF, Oppenheim JJ: Cytokines as positive and negative regulators of tumor promotion and progression. Semin Cancer Biol. 1992, 3 (1): 3-15.

    CAS 
    PubMed 
    Google Scholar
44. Chung YW, Han DS, Park YK, Son BK, Paik CH, Lee HL, Jeon YC, Sohn JH: Association of obesity, serum glucose and lipids with the risk of advanced colorectal adenoma and cancer: a case-control study in Korea. Dig Liver Dis. 2006, 38 (9): 668-672. 10.1016/j.dld.2006.05.014.

    Article 
    CAS 
    PubMed 
    Google Scholar
45. Siemianowicz K, Gminski J, Stajszczyk M, Wojakowski W, Goss M, Machalski M, Telega A, Brulinski K, Magiera-Molendowska H: Serum total cholesterol and triglycerides levels in patients with lung cancer. Int JMol Med. 2000, 5 (2): 201-205.

    CAS 
    Google Scholar
46. Siemianowicz K, Gminski J, Stajszczyk M, Wojakowski W, Goss M, Machalski M, Telega A, Brulinski K, Magiera-Molendowska H: Serum HDL cholesterol concentration in patients with squamous cell and small cell lung cancer. Int J Mol Med. 2000, 6 (3): 307-311.

    CAS 
    PubMed 
    Google Scholar
47. Jiang Jingting, Nilsson-Ehle Peter, Xu Ning: Influence of liver cancer on lipid and lipoprotein metabolism. Lipids in Health and Disease. 2006, 5 (4):
48. Motta M, Giugno I, Ruello P, et al: Lipoprotein (a) behaviour in patients with hepatocellular carcinoma. Minerva Med. 2001, 92: 301-305.

    CAS 
    PubMed 
    Google Scholar
49. Leandro G, Mangia A, Hui J, Fabris P, Rubbia-Brandt L, Colloredo G, Adinolfi LE, Asselah T, Jonsson JR, Smedile A, Terrault N, Pazienza V, Giordani MT, Giostra E, Sonzogni A, Ruggiero G, Marcellin P, Powell EE, George J, Negro F: Relationship between steatosis, inflammation, and fibrosis in chronic hepatitis C: a meta-analysis of individual patient data. Gastroenterology. 2006, 130 (6): 1636-1642. 10.1053/j.gastro.2006.03.014.

    Article 
    PubMed 
    Google Scholar
50. Tessari P, Coracina A, Cosma A, Tiengo A: Hepatic lipid metabolism and non-alcoholic fatty liver disease. Nutr Metab Cardiovasc Dis. 2009, 19 (4): 291-302. 10.1016/j.numecd.2008.12.015.

    Article 
    CAS 
    PubMed 
    Google Scholar

Download references

## Acknowledgements

This research was supported by Science and Technology Commission of Shanghai, China (No 10411955200, 09XD1405800). We are especially grateful for the critical reading from Prof. Fan Jiangao, Xinhua Hospital and Shanghai Jiaotong University.

## Author information

### Authors and Affiliations

1. Department of Laboratory Medicine, Eastern Hepatobiliary Surgery Hospital, Second Military Medical University, Shanghai, China

   Jinyan Zhao, Yunpeng Zhao, Xing Gu, Jun Ji & Chunfang Gao
2. Department of Laboratory Medicine, Changzheng Hospital, Second Military Medical University, Shanghai, China

   Hao Wang

Authors

1. Jinyan Zhao

   View author publications

   You can also search for this author in
   PubMed Google Scholar
2. Yunpeng Zhao

   View author publications

   You can also search for this author in
   PubMed Google Scholar
3. Hao Wang

   View author publications

   You can also search for this author in
   PubMed Google Scholar
4. Xing Gu

   View author publications

   You can also search for this author in
   PubMed Google Scholar
5. Jun Ji

   View author publications

   You can also search for this author in
   PubMed Google Scholar
6. Chunfang Gao

   View author publications

   You can also search for this author in
   PubMed Google Scholar

### Corresponding author

Correspondence to
Chunfang Gao.

## Additional information

### Competing interests

The authors declare that they have no competing interests.

### Authors' contributions

JYZ carried out the patients enrollment, biochemistry analysis and drafted the manuscript. YPZ carried out the biochemistry and antioxidant determinations. HW participated the subjects enrollment and part of the biochemistry detections. XG participated the MDA determination and statistic analysis. JJ participated part of the biochemistry analysis. CFG was responsible for the study design, data analysis and manuscript modification. All authors read and approved the final manuscript.

## Electronic supplementary material

### 12937\_2010\_378\_MOESM1\_ESM.PDF

Additional file 1: Stratum analysis of parameters in accordance with age. After stratified by age, the results were similar to what we have got from the whole subjects. (PDF 56 KB)

### 12937\_2010\_378\_MOESM2\_ESM.PDF

Additional file 2: Stratum analysis of parameters in accordance with gender. After stratified by gender, the results were similar to what we have got from the whole subjects. (PDF 31 KB)

### 12937\_2010\_378\_MOESM3\_ESM.PDF

Additional file 3: The associaton between tumor size and TG or GGT. Correlation analysis between tumor size and TG. The tumor size was negatively associated with TG and positively related to GGT. (PDF 67 KB)

## Authors’ original submitted files for images

Below are the links to the authors’ original submitted files for images.

### Authors’ original file for figure 1

### Authors’ original file for figure 2

## Rights and permissions

**Open Access**
This article is published under license to BioMed Central Ltd. This is an Open Access article is distributed under the terms of the Creative Commons Attribution License (
https://creativecommons.org/licenses/by/2.0
), which permits unrestricted use, distribution, and reproduction in any medium, provided the original work is properly cited.

Reprints and permissions

## About this article

### Cite this article

Zhao, J., Zhao, Y., Wang, H. *et al.* Association between metabolic abnormalities and HBV related hepatocelluar carcinoma in Chinese: A cross-sectional study.
*Nutr J* **10**, 49 (2011). https://doi.org/10.1186/1475-2891-10-49

Download citation

- Received: 16 November 2010
- Accepted: 15 May 2011
- Published: 15 May 2011
- DOI: https://doi.org/10.1186/1475-2891-10-49

### Share this article

Anyone you share the following link with will be able to read this content:

Get shareable link

Sorry, a shareable link is not currently available for this article.

Copy to clipboard

Provided by the Springer Nature SharedIt content-sharing initiative

### Keywords

- Free Fatty Acid
- Glycated Albumin
- Quantitative Insulin Sensitivity Check Index
- Body Mass Index Subgroup
- Serum Free Fatty Acid Level

Download PDF

Download ePub

Advertisement

#### Nutrition Journal

ISSN: 1475-2891

#### Contact us

- General enquiries: journalsubmissions@springernature.com

- Read more on our blogs
- Receive BMC newsletters
- Manage article alerts
- Language editing for authors
- Scientific editing for authors

- Policies
- Accessibility
- Press center

- Support and Contact
- Leave feedback
- Careers

### Follow BMC

- BMC Twitter page
- BMC Facebook page
- BMC Weibo page

By using this website, you agree to our
Terms and Conditions,
Your US state privacy rights,
Privacy
statement and
Cookies policy.
Your privacy choices/Manage cookies we use in the preference centre.

© 2024 BioMed Central Ltd unless otherwise stated. Part of
Springer Nature.

xml version="1.0" encoding="UTF-8"?
